# Supplementary material for: Highly efficient Ni–NiO/carbon nanotubes catalysts for the selective transfer hydrogenation of 5-hydroxymethylfurfural to 2,5-bis(hydroxymethyl)furan
Source: Royal Society of Chemistry journal article supplement (doi:10.1039/d2re00134a), 2022-01-01
Supplement: d2re00134a1.pdf [file d2re00134a1.pdf]

## Supporting Information

Highly efficient Ni-NiO/carbon nanotubes catalysts for the selective transfer hydrogenation of 5-hydroxymethylfurfural to 2, 5-bis(hydroxymethyl)furan

*Zixuan Liu, Zexing Huang, Wenguang Zhao, Xianxiang Liu\**

National & Local Joint Engineering Laboratory for New Petro-chemical Materials and Fine Utilization of Resources, Key Laboratory of the Assembly and Application of Organic Functional Molecules of Hunan Province, Hunan Normal University, Changsha 410081, P. R. China.

\*Corresponding author: [lxh@hunnu.edu.cn](mailto:lxh@hunnu.edu.cn) (X.X. Liu)

**Table S1** Catalytic performances of different catalysts for the CTH of HMF.

| Entry | Catalyst    | HMF Conversion (%) | Selectivity (%) |      |      |
|-------|-------------|--------------------|-----------------|------|------|
|       |             |                    | BHMF            | EMHF | BEMF |
| 1     | Ni/CNTs     | 72.4               | 66.0            | 30.5 | 3.5  |
| 2     | NiO/CNTs    | 99.8               | 76.0            | 22.7 | 1.3  |
| 3     | Ni-NiO/CNTs | 100.0              | 96.9            | 2.5  | 0.5  |

**Table S2** Comparison results for the CTH of HMF to BHMF using different catalysts

| Entry | Catalyst                               | H-donor      | T (°C) | t (h) | BHMF yield (%) | Ref.      |
|-------|----------------------------------------|--------------|--------|-------|----------------|-----------|
| 1     | Ni-NiO/CNTs                            | ethanol      | 160    | 1     | 96.8           | This work |
| 2     | CuO-Fe <sub>3</sub> O <sub>4</sub> /AC | iso-propanol | 150    | 5     | 92.3           | [1]       |
| 3     | RuCu@NFC                               | iso-propanol | 210    | 12    | 88.8           | [2]       |
| 4     | Ru/Co <sub>3</sub> O <sub>4</sub>      | iso-propanol | 190    | 6     | 82.0           | [3]       |
| 5     | MnO@C-N                                | iso-propanol | 170    | 21    | 93.0           | [4]       |
| 6     | Zr-DTMP                                | 2-butanol    | 140    | 3     | 96.5           | [5]       |

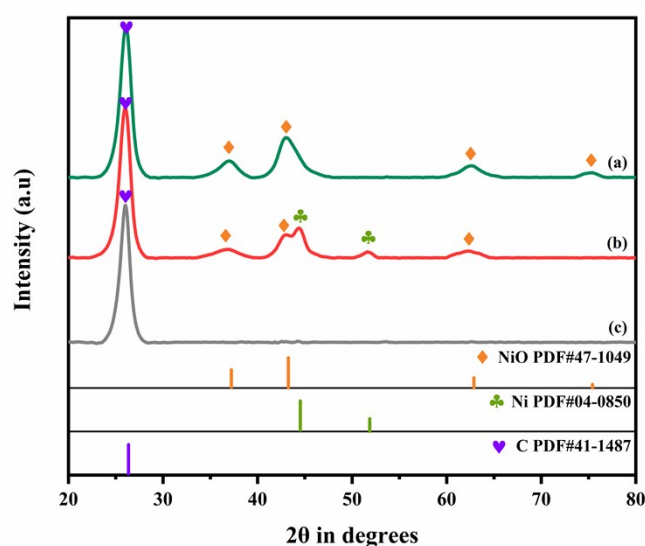**Fig. S1.** XRD spectra of (a) NiO/CNTs catalyst calcinated in N<sub>2</sub> atmosphere, (b) Ni-NiO/CNTs catalyst calcinated in H<sub>2</sub>/Ar atmosphere, and (c) CNTs.

## References

- [1] I. Elsayed, M. A. Jackson and E. B. Hassan, *ACS Sustain. Chem. Eng.*, 2020, **8**, 1774-1785.
- [2] J. Zhang, W. Xie, Q. Liang, L. Peng and L. He, *ChemistrySelect*, 2019, **4**, 2846-2850.
- [3] T. Wang, J. Zhang, W. Xie, Y. Tang, D. Guo and Y. Ni, *Catalysts*, 2017, **7**, 92.
- [4] Y. Feng, S. Long, G. Yan, B. Chen, J. Sperry, W. Xu, Y. Sun, X. Tang, X. Zeng and L. Lin, *J. Catal.*, 2020, **389**, 157-165.
- [5] L. Hu, N. Li, X. Dai, Y. Guo, Y. Jiang, A. He and J. Xu, *J. Energy Chem.*, 2019, **37**, 82-92.
